# Supplementary material
Source: publisher figshare collection journal article supplement (https://rs.figshare.com/ndownloader/files/12590363)
Supplement: Supplementary file 1 [file 12590363]

**Table S3.** Result of linear mixed model analyses (fixed effects) for the biomass of both facilitator and beneficiary species in each study group (potato moth, aquatic detritivores and carrion beetles. *** P<0.001. t-tests use Satterthwaite approximations to degrees of freedom.

|  | Estimate | SE | t-value | P-value |
| --- | --- | --- | --- | --- |
| Tuber moth - facilitator |  |  |  |  |
| Intercept | 29.8373 | 0.7717 | 38.662 | <2e-16*** |
| Stress | -0-0147 | 0.0113 | -1.295 | 0.199 |
| sp_treatment | 0.1855 | 1.0161 | 0.183 | 0.856 |
| Stress*sp_treatment | -0.0764 | 0.0116 | -4.760 | 7.66e-06*** |
| Tuber moth - beneficiary |  |  |  |  |
| Intercept | 19.9304 | 0.8113 | 24.563 | <2e-16*** |
| Stress | -0.0806 | 0.0128 | -6.284 | 9.65e-09*** |
| sp_treatment | -0.4716 | 1.1474 | -0.411 | 0.6819 |
| Stress*sp_treatment | 0.0736 | 0.0181 | 4.058 | 0.0010*** |
| Aquatic detritivore - facilitator |  |  |  |  |
| Intercept | 30.7755 | 1.6887 | 18.224 | <2e-16*** |
| Stress | -0.1192 | 0.0233 | -5.115 | 1.8e-06 |
| sp_treatment | -1.2353 | 2.2873 | -0.540 | 0.591 |
| Stress*sp_treatment | 0.0075 | 0.0329 | 0.228 | 0.820 |
| Aquatic detritivore - beneficiary |  |  |  |  |
| Intercept | 50.1002 | 1.4963 | 33.482 | <2e-16*** |
| Stress | -0.4159 | 0.0205 | -20.261 | <2e-16*** |
| sp_treatment | -13.099 | 2.0139 | -6.504 | 4.76e-09*** |
| Stress*sp_treatment | 0.1472 | 0.0290 | 5.072 | 2.20e-06*** |
| Carrion beetle - facilitator |  |  |  |  |
| Intercept | 25.2402 | 1.5516 | 16.267 | <2e-16*** |
| Stress | -0.0259 | 0.0244 | -1.062 | 0.295 |
| sp_treatment | 0.7719 | 2.1943 | 0.352 | 0.727 |
| Stress*sp_treatment | -0.0339 | 0.0344 | -0.984 | 0.332 |
| Carrion beetle - beneficiary |  |  |  |  |
| Intercept | 21.6297 | 1.1209 | 19.835 | <2e-16*** |
| Stress | -0.0647 | 0.0222 | -2.914 | 0.0061** |
| sp_treatment | -1.2356 | 2.0007 | -0.618 | 0.5407 |
| Stress*sp_treatment | 0.0797 | 0.3141 | 2.538 | 0.0156* |
